# Supplementary material
Source: PubMed Central journal article supplement (PMC3100753)
Supplement: supp_jc.2010-2600_10-2600_Supp_Table_2.pdf [file supp_jc.2010-2600_10-2600_Supp_Table_2.pdf]

**Supplemental Table 2A.** Genes down-regulated in PCOS compared to MSeN, all had a corrected  $P < 0.001$

| Gene name                                                                                              | UniGene ID | Fold change<br>PCOScc vs<br>MSeN | Fold change<br>PCOSp vs<br>MSeN |
|--------------------------------------------------------------------------------------------------------|------------|----------------------------------|---------------------------------|
| S100 calcium binding protein P                                                                         | Hs.2962    | 28.71                            | 23.27                           |
| claudin 4                                                                                              | Hs.718794  | 6.93                             | 2.57                            |
| prostaglandin E receptor 3 (subtype EP3)                                                               | Hs.445000  | 6.87                             | 6.82                            |
| outer dense fiber of sperm tails 3B                                                                    | Hs.531314  | 5.04                             | 4.48                            |
| junctional sarcoplasmic reticulum protein 1                                                            | Hs.712901  | 4.72                             | 4.20                            |
| hypothetical protein LOC100131564                                                                      | Hs.714927  | 4.60                             | 3.70                            |
| Ribosomal protein L37a                                                                                 | Hs.433701  | 4.30                             | 4.10                            |
| B1 for mucin                                                                                           | Hs.701992  | 4.25                             | 4.03                            |
| runt-related transcription factor 3                                                                    | Hs.170019  | 4.15                             | 3.74                            |
| Transferrin receptor (p90, CD71)                                                                       | Hs.529618  | 4.12                             | 3.64                            |
| hypothetical locus LOC401237                                                                           | Hs.399719  | 4.11                             | 4.03                            |
| glycoprotein Ib (platelet), beta polypeptide                                                           |            | 4.11                             | 3.81                            |
| patatin-like phospholipase domain containing 2                                                         | Hs.654697  | 4.08                             | 3.15                            |
| ubiquitin-conjugating enzyme E2H (UBC8 homolog, yeast)                                                 | Hs.643548  | 4.02                             | 3.27                            |
| protein tyrosine phosphatase-like (proline instead of catalytic arginine), member A                    | Hs.114062  | 4.00                             | 3.31                            |
| hypothetical LOC388692                                                                                 |            | 4.00                             | 3.91                            |
| hypothetical LOC728649 /// hypothetical LOC728701                                                      |            | 3.97                             | 3.70                            |
| G protein-coupled receptor 144                                                                         | Hs.454099  | 3.94                             | 3.66                            |
| surfactant protein C                                                                                   | Hs.1074    | 3.91                             | 3.13                            |
| transmembrane protein 151B                                                                             | Hs.632851  | 3.90                             | 3.82                            |
| double homeobox, 4 /// double homeobox, 4-like /// double homeobox, 4-like /// double homeobox, 4-like |            |                                  |                                 |
| double homeobox, 4-like /// double homeobox, 4-like                                                    | Hs.714687  | 3.84                             | 3.40                            |
| chromosome 14 open reading frame 45                                                                    | Hs.644621  | 3.78                             | 2.94                            |
| transcription factor 15 (basic helix-loop-helix)                                                       | Hs.437     | 3.72                             | 3.39                            |
| adenosine deaminase, RNA-specific, B1 (RED1 homolog rat)                                               | Hs.474018  | 3.71                             | 3.36                            |
| Phosphodiesterase 3B, cGMP-inhibited                                                                   | Hs.445711  | 3.64                             | 3.36                            |
| chromosome 19 open reading frame 68                                                                    | Hs.664054  | 3.63                             | 3.55                            |
| Rho GTPase activating protein 23                                                                       | Hs.374446  | 3.62                             | 3.05                            |
| transmembrane protein 151B                                                                             | Hs.632851  | 3.62                             | 3.53                            |
| TEA domain family member 2                                                                             | Hs.515534  | 3.61                             | 3.56                            |
| hypothetical LOC645895 /// v-myb myeloblastosis viral oncogene homolog (avian)-like 1                  | Hs.445898  | 3.61                             | 3.21                            |
| sodium channel, nonvoltage-gated 1 alpha                                                               | Hs.591047  | 3.61                             | 3.12                            |
| discoidin, CUB and LCCL domain containing 2                                                            | Hs.203691  | 3.59                             | 3.24                            |
| zinc finger protein 205                                                                                | Hs.592088  | 3.58                             | 3.11                            |
| neuregulin 1                                                                                           | Hs.453951  | 3.57                             | 3.19                            |
| protein kinase D2                                                                                      | Hs.466987  | 3.56                             | 3.80                            |
| SAP30-like                                                                                             | Hs.592566  | 3.54                             | 2.82                            |

|                                                                                         |           |      |      |
|-----------------------------------------------------------------------------------------|-----------|------|------|
| GNAS complex locus                                                                      | Hs.125898 | 3.53 | 3.16 |
| outer dense fiber of sperm tails 3B                                                     | Hs.531314 | 3.50 | 2.98 |
| Hypothetical protein LOC100129701                                                       | Hs.709936 | 3.48 | 3.28 |
| myeloid/lymphoid or mixed-lineage leukemia 4                                            | Hs.92236  | 3.44 | 2.97 |
| discs, large homolog 4 (Drosophila)                                                     | Hs.463928 | 3.40 | 2.86 |
| glioma tumor suppressor candidate region gene 2                                         | Hs.421907 | 3.39 | 3.09 |
| interleukin 34                                                                          | Hs.461214 | 3.37 | 3.05 |
| transportin 2                                                                           | Hs.416049 | 3.36 | 2.56 |
| hypothetical protein LOC157860                                                          | Hs.170296 | 3.33 | 2.73 |
| DEAD (Asp-Glu-Ala-Asp) box polypeptide 54                                               | Hs.506861 | 3.32 | 2.78 |
| chromosome 9 open reading frame 44                                                      | Hs.149940 | 3.31 | 3.25 |
| T-box 1                                                                                 | Hs.173984 | 3.30 | 2.79 |
| Lamin A/C                                                                               | Hs.594444 | 3.26 | 2.67 |
| nicotinamide nucleotide adenylyltransferase 3                                           | Hs.208673 | 3.25 | 2.61 |
| centrobin, centrosomal BRCA2 interacting protein                                        | Hs.348012 | 3.23 | 2.79 |
| PWWP domain containing 2B                                                               | Hs.527751 | 3.22 | 2.76 |
| hypothetical protein MGC10814                                                           | Hs.679519 | 3.20 | 2.86 |
| Immunoglobulin heavy constant gamma 1 (G1m marker)                                      | Hs.510635 | 3.19 | 2.93 |
| Family with sequence similarity 84, member A                                            | Hs.260855 | 3.19 | 2.78 |
| transient receptor potential cation channel, subfamily V, member 6                      | Hs.302740 | 3.18 | 2.76 |
| cadherin 15, type 1, M-cadherin (myotubule)                                             | Hs.148090 | 3.18 | 3.07 |
| RAS-like, family 10, member B                                                           | Hs.437035 | 3.17 | 2.78 |
| RAB2A, member RAS oncogene family                                                       | Hs.369017 | 3.17 | 2.91 |
| PDZ and LIM domain 4                                                                    | Hs.424312 | 3.16 | 2.90 |
| Mitogen-activated protein kinase kinase kinase 7 interacting protein 1                  | Hs.507681 | 3.13 | 2.87 |
| SRY (sex determining region Y)-box 15                                                   | Hs.95582  | 3.12 | 2.81 |
| transmembrane protein with EGF-like and two follistatin-like domains 2                  | Hs.144513 | 3.12 | 3.09 |
| pre T-cell antigen receptor alpha                                                       | Hs.169002 | 3.12 | 2.89 |
| pleckstrin homology domain containing, family G (with RhoGef domain) member 5           | Hs.284232 | 3.11 | 2.88 |
| hypothetical LOC389458                                                                  | Hs.720724 | 3.08 | 2.87 |
| microtubule-associated protein, RP/EB family, member 3                                  | Hs.515860 | 3.07 | 2.89 |
| IQ motif containing C                                                                   | Hs.274356 | 3.06 | 3.11 |
| leucine rich repeat containing 16B                                                      | Hs.26135  | 3.05 | 3.45 |
| leukocyte receptor tyrosine kinase                                                      | Hs.434481 | 3.04 | 3.04 |
| secretin                                                                                | Hs.632324 | 3.04 | 3.06 |
| mannosyl (alpha-1,6-)-glycoprotein beta-1,6-N-acetyl-glucosaminyltransferase, isozyme B | Hs.144531 | 3.03 | 2.82 |
| fucosyltransferase 7 (alpha (1,3) fucosyltransferase)                                   | Hs. 457   | 3.03 | 2.59 |
| Neuropeptide B                                                                          | Hs.585089 | 3.03 | 2.75 |
| F-box protein 44                                                                        | Hs.556006 | 3.03 | 2.98 |
| mitogen-activated protein kinase 8 interacting protein 3                                | Hs.207763 | 3.01 | 2.77 |
| hypothetical MGC50722                                                                   | Hs.530383 | 2.99 | 3.02 |

|                                                                                     |           |      |      |
|-------------------------------------------------------------------------------------|-----------|------|------|
| chorionic gonadotropin, beta polypeptide ///                                        |           |      |      |
| chorionic gonadotropin, beta polypeptide 5 ///                                      |           |      |      |
| chorionic gonadotropin, beta polypeptide 7                                          | Hs.172944 | 2.97 | 2.54 |
| REX1, RNA exonuclease 1 homolog (S. cerevisiae)                                     | Hs.192477 | 2.96 | 2.73 |
| spermatogenesis associated 21                                                       | Hs.705501 | 2.95 | 2.63 |
| chromosome 11 open reading frame 30                                                 | Hs.352588 | 2.95 | 2.96 |
| alpha-2-glycoprotein 1, zinc-binding ///                                            |           |      |      |
| glycoprotein 1, zinc-binding pseudogene 1                                           | Hs.546239 | 2.95 | 3.51 |
| S100 calcium binding protein A7A                                                    | Hs.442337 | 2.93 | 2.52 |
| ELAV (embryonic lethal, abnormal vision, Drosophila)-like 3 (Hu antigen C)          | Hs.1701   | 2.91 | 2.64 |
| Rho GTPase activating protein 30                                                    | Hs.389374 | 2.90 | 2.61 |
| MORN repeat containing 1                                                            | Hs.642701 | 2.90 | 2.66 |
| inositol-3-phosphate synthase 1                                                     | Hs.405873 | 2.90 | 2.78 |
| rhophilin, Rho GTPase binding protein 1                                             | Hs.521912 | 2.85 | 2.81 |
| spectrin, beta, non-erythrocytic 4                                                  | Hs.32706  | 2.84 | 2.73 |
| tubulin tyrosine ligase-like family, member 9                                       | Hs.712915 | 2.82 | 2.81 |
| calcium/calmodulin-dependent protein kinase II delta                                | Hs.144114 | 2.82 | 2.56 |
| Dapper, antagonist of beta-catenin, homolog 3 (Xenopus laevis)                      | Hs.515490 | 2.79 | 2.77 |
| Biogenesis of lysosomal organelles complex-1, subunit 3                             | Hs.103902 | 2.78 | 2.69 |
| platelet-activating factor receptor                                                 | Hs.709174 | 2.78 | 2.87 |
| transmembrane protein 151A                                                          | Hs.399779 | 2.78 | 2.79 |
| carboxylesterase 4-like                                                             | Hs.535486 | 2.77 | 2.91 |
| nuclear factor of kappa light polypeptide gene enhancer in B-cells inhibitor-like 2 | Hs.675285 | 2.75 | 2.60 |
| metastasis associated lung adenocarcinoma transcript 1 (non-protein coding)         | Hs.642877 | 2.74 | 2.61 |
| Hypothetical LOC146880                                                              | Hs.117853 | 2.74 | 2.67 |
| fms-related tyrosine kinase 4                                                       | Hs.646917 | 2.69 | 2.56 |
| fibroblast growth factor 18                                                         | Hs.87191  | 2.65 | 2.59 |
| ATP-binding cassette, sub-family B (MDR/TAP), member 6                              | Hs.107911 | 2.62 | 2.56 |
| hypothetical LOC729177                                                              | Hs.712707 | 2.58 | 2.57 |
| THAP domain containing, apoptosis associated protein 3                              | Hs.709655 | 2.56 | 2.57 |
| ADAM metallopeptidase with thrombospondin type 1 motif, 7                           | Hs.16441  | 2.56 | 2.56 |
| forkhead box P3                                                                     | Hs.247700 | 2.55 | 2.53 |
| keratin 3                                                                           | Hs.680652 | 2.53 | 2.54 |

**Supplemental Table 2B.** Genes up-regulated in PCOS compared to MSeN, all had a corrected  $P < 0.001$

| Gene name                                                                                            | UniGene ID | Fold change<br>PCOScc vs<br>MSeN | Fold change<br>PCOSp vs<br>MSeN |
|------------------------------------------------------------------------------------------------------|------------|----------------------------------|---------------------------------|
| anillin, actin binding protein                                                                       | Hs.62180   | 9.06                             | 4.05                            |
| topoisomerase (DNA) II alpha 170kDa                                                                  | Hs.156346  | 8.59                             | 2.79                            |
| PDZ binding kinase                                                                                   | Hs.104741  | 7.98                             | 3.04                            |
| MAD2 mitotic arrest deficient-like 1 (yeast)                                                         | Hs.591697  | 7.50                             | 3.50                            |
| topoisomerase (DNA) II alpha 170kDa                                                                  | Hs.156346  | 7.18                             | 2.97                            |
| hyaluronan-mediated motility receptor (RHAMM)                                                        | Hs.72550   | 7.14                             | 3.21                            |
| TTK protein kinase                                                                                   | Hs.169840  | 6.90                             | 2.99                            |
| ribonucleotide reductase M2 polypeptide                                                              | Hs.226390  | 6.81                             | 3.53                            |
| cyclin B1                                                                                            | Hs.23960   | 6.71                             | 3.24                            |
| asp (abnormal spindle) homolog, microcephaly associated (Drosophila)                                 | Hs.121028  | 6.34                             | 2.78                            |
| centrosomal protein 55kDa                                                                            | Hs.14559   | 6.33                             | 2.99                            |
| leukemia inhibitory factor receptor alpha                                                            | Hs.133421  | 5.84                             | 2.93                            |
| cyclin E2                                                                                            | Hs.567387  | 5.44                             | 2.66                            |
| helicase, lymphoid-specific                                                                          | Hs.655830  | 4.95                             | 3.15                            |
| dystrophin                                                                                           | Hs.495912  | 4.21                             | 2.89                            |
| Rac GTPase activating protein 1                                                                      | Hs.505469  | 4.02                             | 2.85                            |
| LSM5 homolog, U6 small nuclear RNA associated (S. cerevisiae)                                        | Hs.424908  | 3.56                             | 3.24                            |
| TATA element modulatory factor 1                                                                     | Hs.267632  | 3.34                             | 2.80                            |
| trinucleotide repeat containing 6B                                                                   | Hs.372082  | 3.33                             | 2.70                            |
| hook homolog 3 (Drosophila)                                                                          | Hs.162852  | 3.31                             | 2.87                            |
| La ribonucleoprotein domain family, member 4                                                         | Hs.26613   | 3.18                             | 3.30                            |
| cell division cycle 6 homolog (S. cerevisiae)                                                        | Hs.405958  | 3.17                             | 3.07                            |
| CDC28 protein kinase regulatory subunit 2                                                            | Hs.83758   | 3.10                             | 2.54                            |
| LSM5 homolog, U6 small nuclear RNA associated (S. cerevisiae)                                        | Hs.424908  | 3.09                             | 2.84                            |
| B-cell CLL/lymphoma 11A (zinc finger protein)                                                        | Hs.370549  | 2.94                             | 2.87                            |
| zinc finger protein 430                                                                              | Hs.466289  | 2.94                             | 2.65                            |
| mannosidase, endo-alpha                                                                              | Hs.533323  | 2.93                             | 2.73                            |
| FtsJ methyltransferase domain containing 1                                                           | Hs.72782   | 2.92                             | 2.62                            |
| chromosome 12 open reading frame 66                                                                  | Hs.505871  | 2.81                             | 2.86                            |
| zinc finger, MYM-type 5                                                                              | Hs.530988  | 2.76                             | 2.50                            |
| lysophosphatidylcholine acyltransferase 2                                                            | Hs.460857  | 2.75                             | 3.17                            |
| retinitis pigmentosa 2 (X-linked recessive)                                                          | Hs.44766   | 2.71                             | 2.60                            |
| steroid-5-alpha-reductase, alpha polypeptide 1 (3-oxo-5 alpha-steroid delta 4-dehydrogenase alpha 1) | Hs.552     | 2.68                             | 2.61                            |
| activating transcription factor 1                                                                    | Hs.648565  | 2.68                             | 2.60                            |
| FUS interacting protein (serine/arginine-rich) 1                                                     | Hs.3530    | 2.64                             | 2.53                            |
| ubiquitin-like domain containing CTD phosphatase 1                                                   | Hs.591733  | 2.62                             | 2.67                            |
| spastin                                                                                              | Hs.468091  | 2.51                             | 2.52                            |
